# Supplementary material for: TLR2-mediated activation of innate responses in the upper airways confers antiviral protection of the lungs
Source: PubMed Central journal article supplement (PMC8021123; doi:10.1172/jci.insight.140267), 2021-03-08
Supplement: jciinsight-6-140267-s085.pdf [file jciinsight-6-140267-s085.pdf]

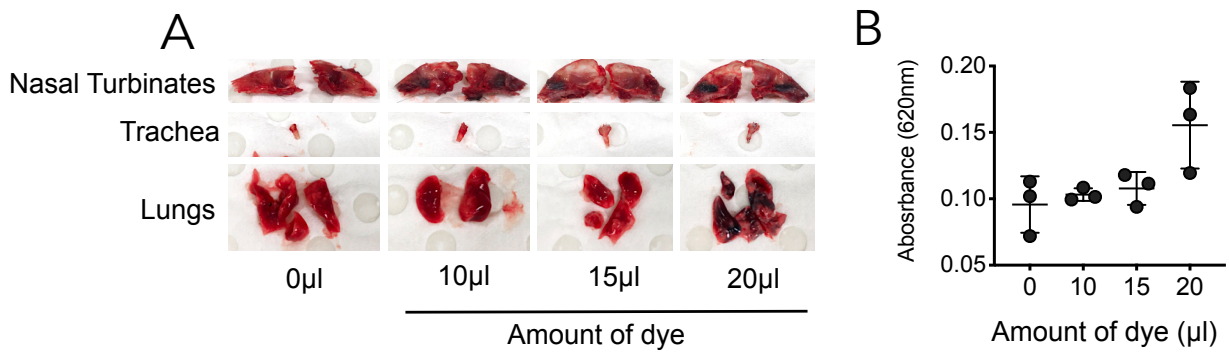

**Supplementary Figure 1. Administration of increasing volumes of Evans blue dye and distribution within the respiratory tract.** Increasing volumes of PBS containing 0.125% Evans blue dye were administered intranasally to anaesthetised mice (n=3/group). **(A)** Mice were killed by CO<sub>2</sub> asphyxiation 5 minutes after Evans blue administration and nasal turbinates, trachea and lungs harvested for visual inspection. **(B)** Evans blue in mouse lungs was quantified by reading the absorbance (at 620nm) of acid precipitated, clarified lung supernatants.

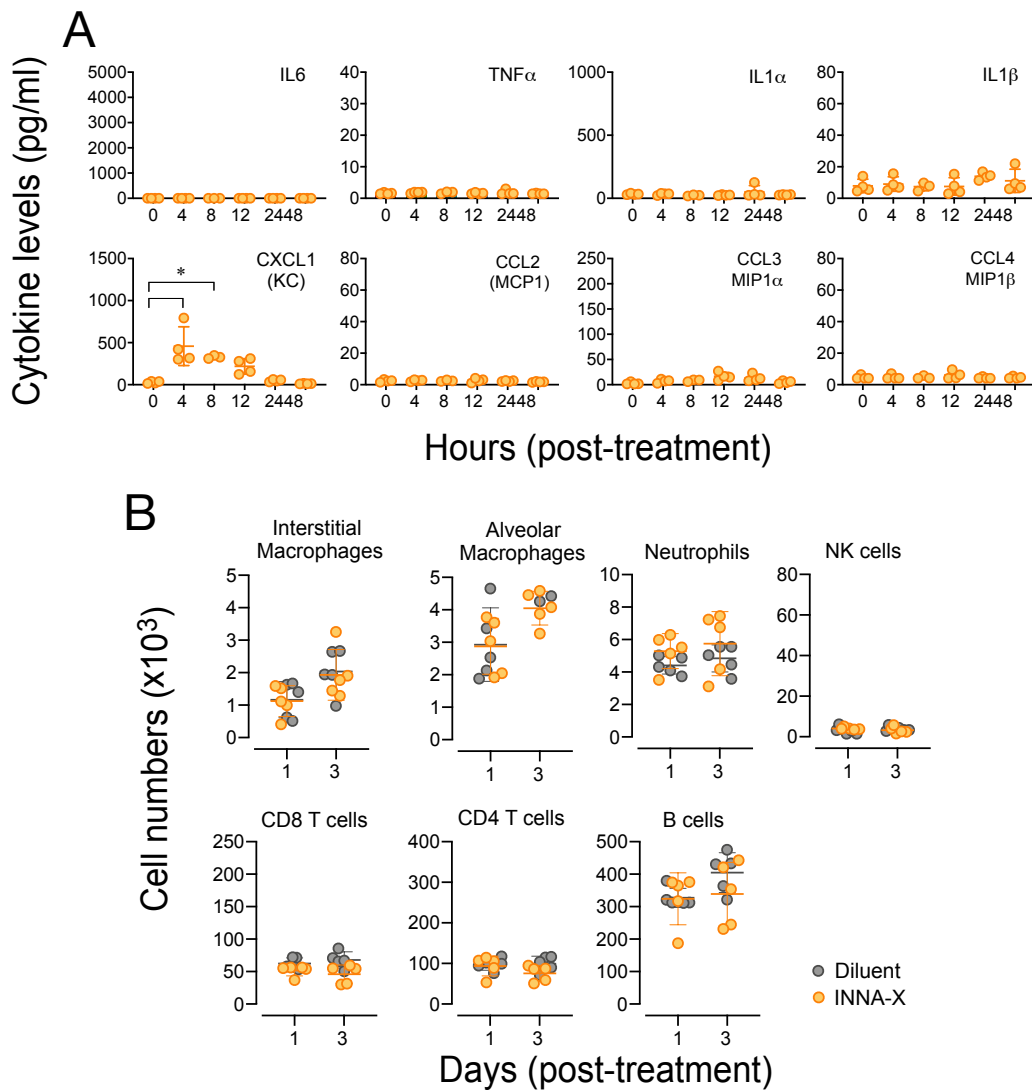

**Supplementary Figure 2. Cytokines and cell populations in the lungs following INNA-X treatment.** Mice (n=4/group) were inoculated with 1nmole of INNA-X or diluent only and at various time points, (A) cytokine levels in nasal turbinates were analysed in a multiplex bead array assay. (B) Lungs from mice (n=5/group) treated similarly were also harvested 1 and 3 days later and cell populations analysed by flow cytometry. Statistical analysis was performed by (A) one-way ANOVA with a Tukey post-hoc test and (B) two-way ANOVA with a Bonferroni post-hoc test. \* $p < 0.05$ .

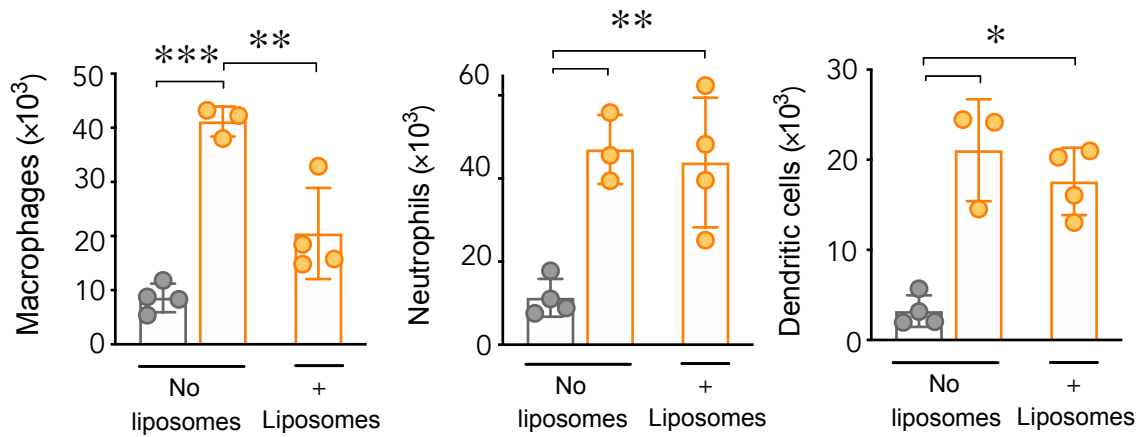

**Supplementary Figure 3. Clodronate administration results in selective depletion of macrophages**  
Mice (n=3/group) were inoculated with 1nmole of INNA-X or diluent and 1 day later received clodronate liposomes via the intravenous (200 $\mu$ l) and intranasal route (50 $\mu$ l) or were left untreated. Nasal turbinates were harvested 1 day later and cell populations analysed by flow cytometry. Statistical analysis was performed by one-way ANOVA with a Tukey post-hoc test. \* $p < 0.05$ , \*\* $p < 0.01$ , \*\*\* $p < 0.001$ .

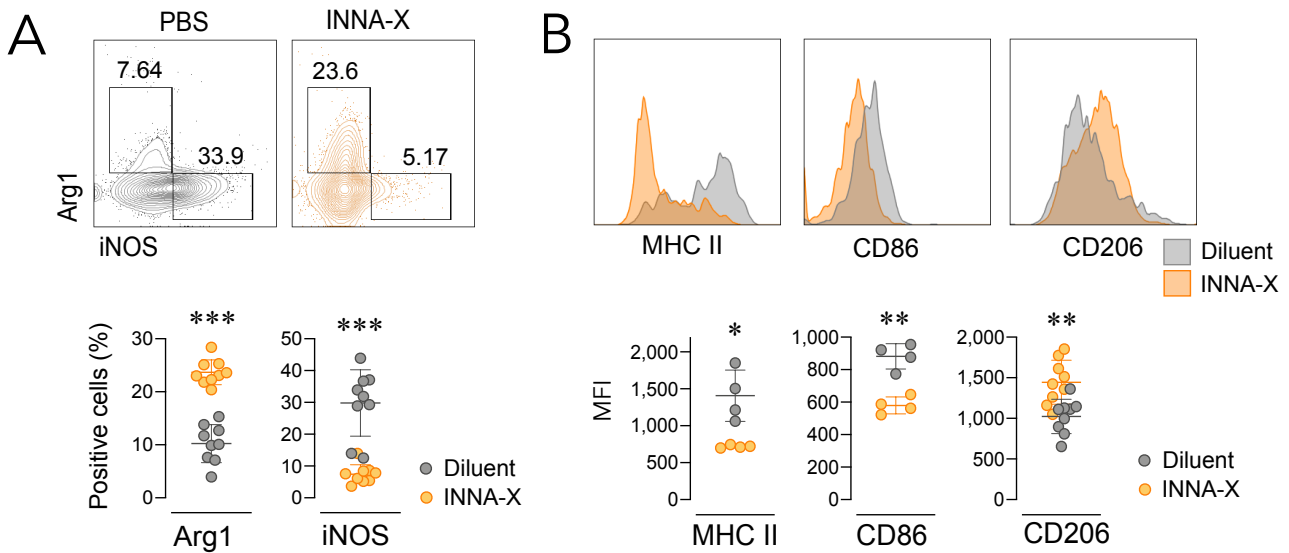

**Supplementary Figure 4. M1 and M2 phenotype of nasal turbinate macrophages following INNA-X treatment.** Mice (n=4-9/group) were inoculated with 1nmole of INNA-X or diluent only. Nasal turbinates were harvested 1 day later and F480<sup>+</sup> macrophages analysed for expression of (A) intracellular (Arg-1 and iNOS). The results depict (top) a representative dot plot from a single animal and (bottom) percentage of positive cells for each marker within each group. (B) Cells were also analysed for surface expression of MHC II, CD86 and CD206 with (top) a representative histogram from a single animal and (bottom) mean fluorescence intensity (MFI) of each marker within each group. Statistical analysis was performed using a Welch t-test. \* $p < 0.05$ , \*\* $p < 0.01$ , \*\*\* $p < 0.001$ .

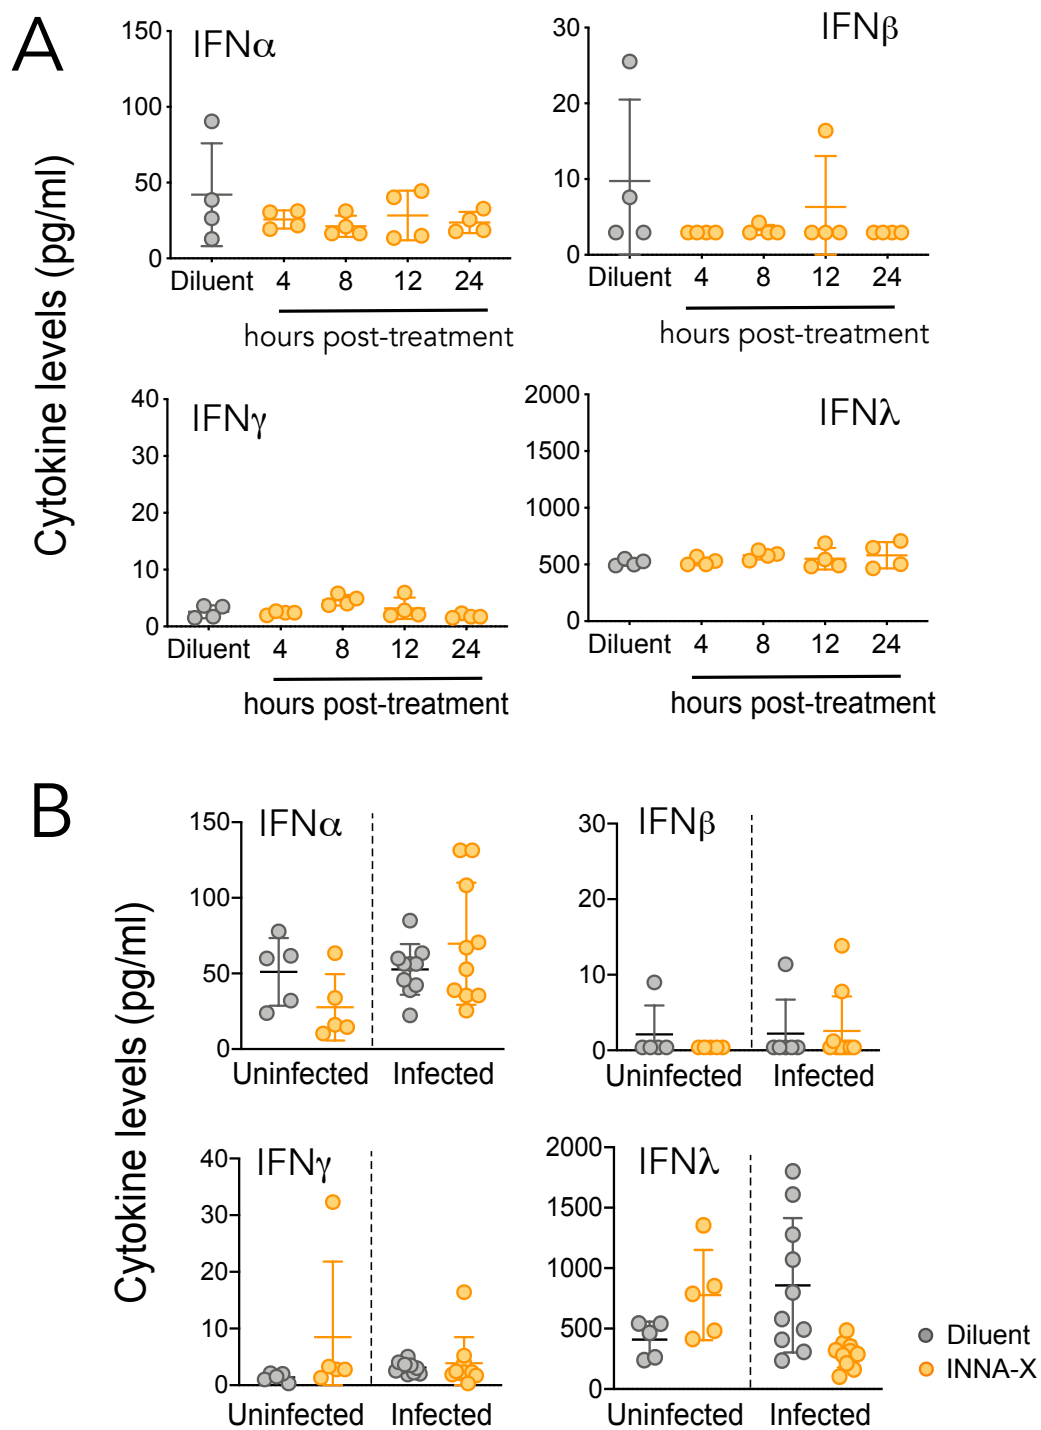

**Supplementary Figure 5. IFN levels in the nasal turbinates following INNA-X treatment and virus challenge.** (A) Mice (n=4/group) were inoculated in the URT with 1nmole of INNA-X and 4, 8, 12 or 24 hours later, IFN levels in the nasal turbinates were measured. Levels of IFN were also determined in mice treated 24-hours prior with diluent. (B) IFN levels were measured in the nasal turbinates of mice treated 1 day earlier with diluent or INNA-X but were not challenged with virus. Separate groups of identically treated animals (n=5/group) were challenged with 500pfu of Udorn IAV 1 day after inoculation with INNA-X and IFN-levels present in nasal turbinates measured at 1 day after viral challenge.
